# Supplementary material
Source: PubMed Central journal article supplement (PMC5910805)
Supplement: pnas.201700299SI.pdf [file pnas.201700299SI.pdf]

# Supporting Information

Liu et al. 10.1073/pnas.1700299114

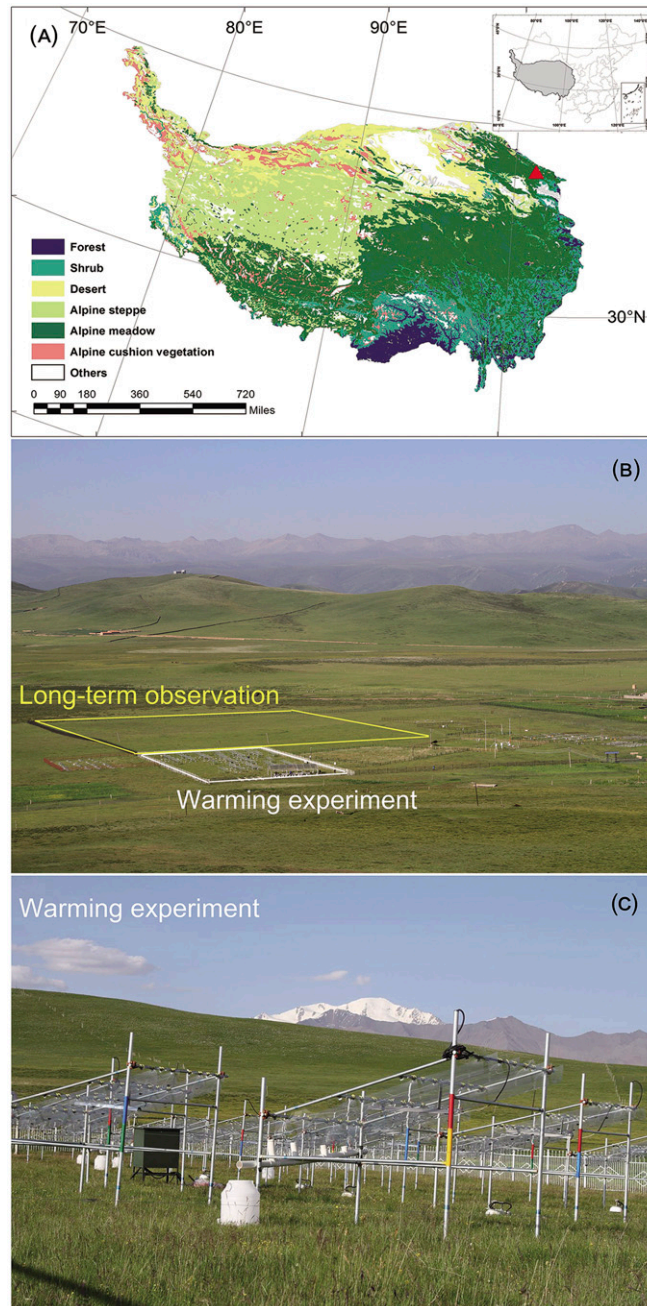

**Fig. S1.** Geographical location of the study site against the background map of the vegetation of the Tibetan Plateau (A), the landscape of the permanent field site at the Haibei National Field Research Station of the Alpine Grassland Ecosystem (B), and the warming and precipitation experiment site (C). In B, the yellow lines represent the long-term monitoring area, and the white lines represent the warming and precipitation experiment site.

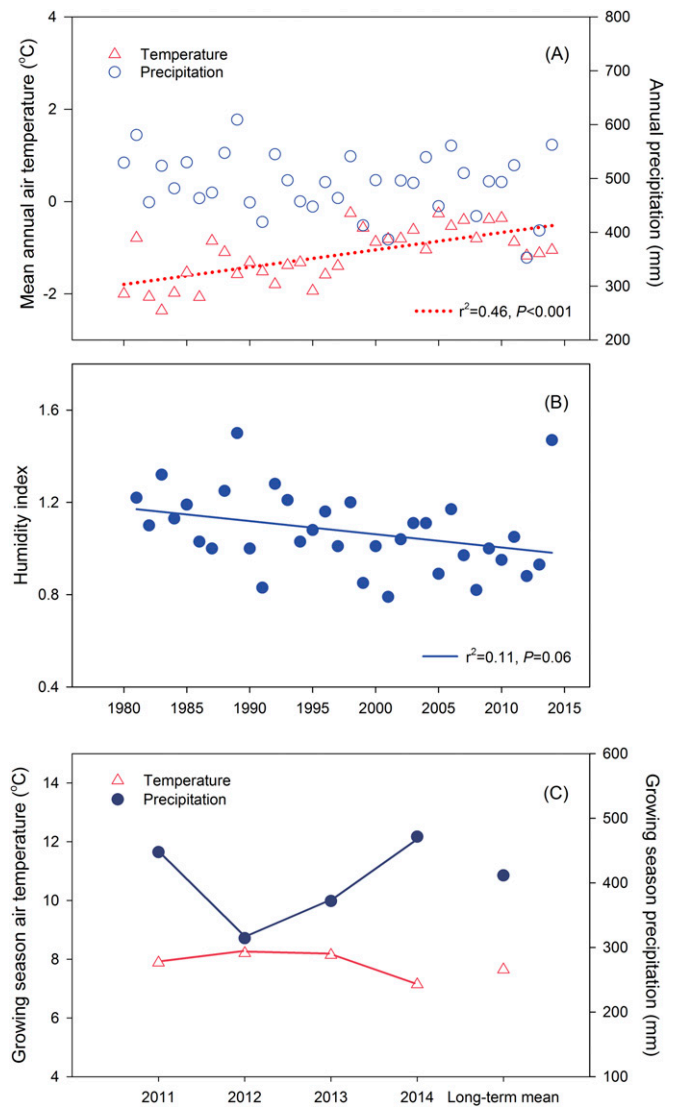

**Fig. S2.** Changes in climate-related variables long-term and from 2011 to 2014 when the experiment was conducted. Variations in mean annual air temperature, annual precipitation (A) and humidity index (B) over 1980–2014, and growing season (May–September), mean air temperature and precipitation over 2011–2014 (C). The humidity index was calculated as the ratio of precipitation to PET (potential evapotranspiration).

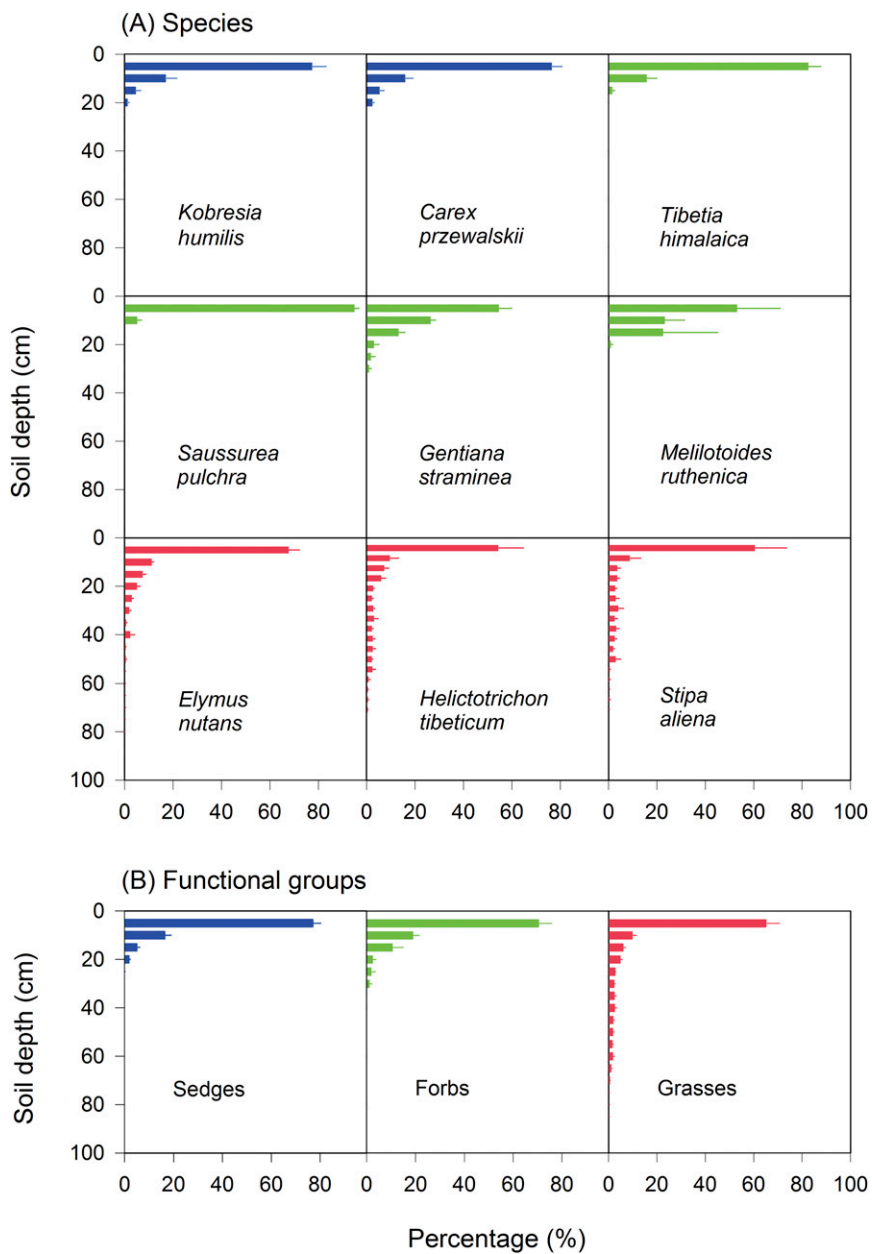

**Fig. 53.** Vertical distributions of roots for nine common plant species (A) from three functional groups (B), which account for about 72% of community ANPP. Different colors denote different functional groups (blue = sedges; green = forbs; red = grasses).

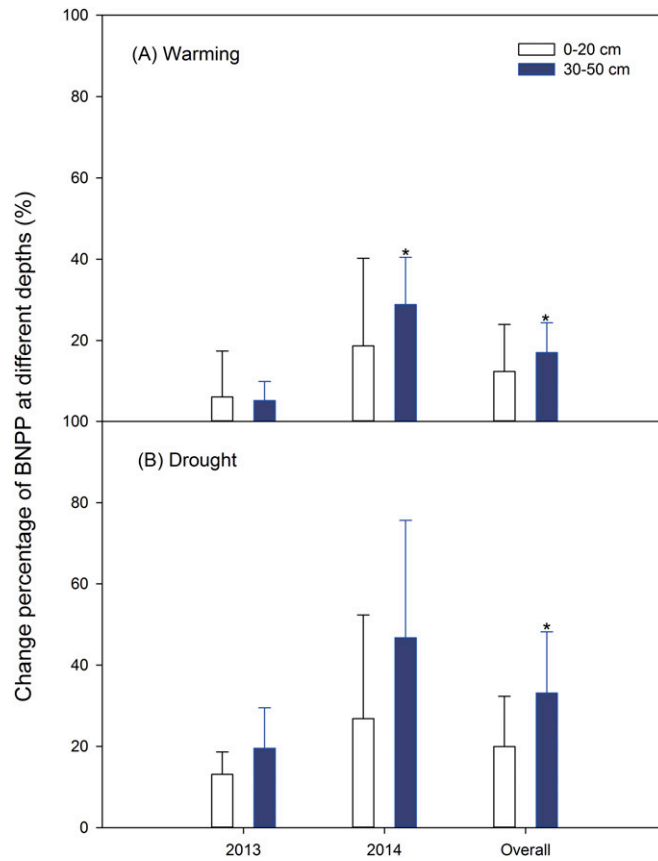

**Fig. S4.** Warming (A) and drought (B) effects on change percentage ((warming/drought – control)/control × 100) of belowground net primary production (BNPP) at different soil depths using minirhizotron. Vertical bars represent the SEMs (*n* = 4). Asterisks indicate significant differences between treatments and control (*P* < 0.05), or the change percentage is statistically different from zero (*P* < 0.05).

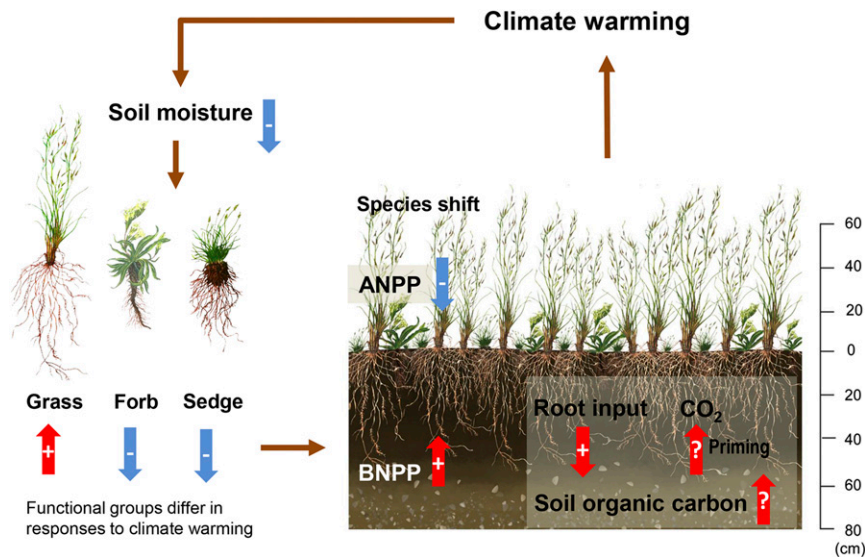

**Fig. S5.** A conceptual model of the impact of warming on ecosystem processes and the potential feedbacks to climate warming in the alpine ecosystem on the Tibetan Plateau. Red arrows with "+" indicate increase, blue arrows with "-" indicate decrease, and arrows with "?" indicate uncertainty. Our data show that climate warming reduces soil moisture, which leads to species shift (i.e., increase in grass abundance at the cost of forbs and sedges). This species shift does not affect total NPP, but changes NPP allocation (i.e., decrease in ANPP and increase in BNPP). As a result, root carbon inputs to subsoil increase, the CO<sub>2</sub> flux from subsoil decomposition (accelerated by possible priming effect) also may increase, but the storage of subsoil soil organic carbon remains uncertain because of the uncertainty in the relative change of root input vs. subsoil decomposition.

**Table S1. Relative abundance of different plant functional groups in control, warming and drought plots from 2011 to 2014**

| Year | Treatment | Grass        | Forb         | Sedge       |
|------|-----------|--------------|--------------|-------------|
| 2011 | Control   | 64.86 ± 1.19 | 31.25 ± 1.96 | 3.89 ± 1.79 |
| 2011 | Warming   | 69.83 ± 6.33 | 24.37 ± 4.95 | 5.80 ± 4.95 |
| 2011 | Drought   | 60.65 ± 7.55 | 34.63 ± 4.06 | 4.72 ± 3.52 |
| 2012 | Control   | 59.09 ± 0.67 | 37.26 ± 1.26 | 3.66 ± 1.02 |
| 2012 | Warming   | 75.76 ± 3.31 | 21.89 ± 2.80 | 2.35 ± 0.57 |
| 2012 | Drought   | 74.94 ± 0.81 | 22.81 ± 1.00 | 2.25 ± 0.32 |
| 2013 | Control   | 52.92 ± 3.36 | 40.53 ± 3.19 | 6.54 ± 0.38 |
| 2013 | Warming   | 67.18 ± 1.01 | 29.82 ± 2.04 | 2.99 ± 1.23 |
| 2013 | Drought   | 64.46 ± 2.10 | 32.39 ± 2.60 | 3.14 ± 0.93 |
| 2014 | Control   | 63.66 ± 3.21 | 29.51 ± 3.98 | 6.82 ± 1.98 |
| 2014 | Warming   | 66.46 ± 2.99 | 27.90 ± 3.45 | 5.62 ± 1.54 |
| 2014 | Drought   | 70.76 ± 2.48 | 23.34 ± 3.08 | 5.90 ± 0.85 |

Values are mean ± SEM ( $n = 6$ ).

**Table S2. Contributions of aboveground biomass of nine dominant species (which we had data on the vertical distribution of root biomass in Fig. 4) to ANPP from control plots in 2014**

| Species                         | Functional group | Contribution, % |
|---------------------------------|------------------|-----------------|
| <i>Stipa aliena</i>             | Grass            | 37.51           |
| <i>Elymus nutans</i>            | Grass            | 11.99           |
| <i>Helictotrichon tibeticum</i> | Grass            | 7.94            |
| <i>Gentiana straminea</i>       | Forb             | 3.79            |
| <i>Tibetia himalaica</i>        | Forb             | 3.26            |
| <i>Saussurea pulchra</i>        | Forb             | 1.61            |
| <i>Medicago ruthenica</i>       | Forb             | 1.12            |
| <i>Kobresia humilis</i>         | Sedge            | 4.17            |
| <i>Carex przewalskii</i>        | Sedge            | 0.79            |

**Table S3. Research sites included in the meta-analysis in the alpine grasslands on the Tibetan Plateau**

| Location    | Longitude | Latitude | Method     | Duration (a) | Source     |
|-------------|-----------|----------|------------|--------------|------------|
| Hongyuan    | 101°51'   | 31°51'   | OTC        | 2            | 53         |
| Haibei      | 100°51'   | 36°57'   | OTC        | 4            | 54         |
| Haibei      | 101°12'   | 37°37'   | OTC        | 5            | 25         |
| Haibei      | 101°01'   | 37°01'   | OTC        | 2            | 55         |
| Naqu        | 92°10'    | 31°26'   | OTC        | 2            | 56         |
| Niaodao     | 99°44'    | 36°57'   | OTC        | 2            | 57         |
| Fenghuoshan | 92°53'    | 34°43'   | OTC        | 2            | 58         |
| Damxung     | 91°03'    | 30°30'   | OTC        | 5            | 59         |
| Damxung     | 91°05'    | 30°51'   | OTC        | 1            | 60         |
| Guoluo      | 100°22'   | 34°25'   | OTC        | 3            | 61         |
| Kakagou     | 103°33'   | 32°51'   | OTC        | 2            | 62         |
| Haibei      | 101°00'   | 37°00'   | Greenhouse | 1            | 63         |
| Beiluhe     | 92°55'    | 34°49'   | IH         | 3            | 64         |
| Haibei      | 101°12'   | 37°37'   | IH         | 5            | 24         |
| Haibei      | 101°19'   | 37°36'   | IH         | 4            | This study |

OTC, open top chamber; IH, Infrared heaters.

**Table S4. Mechanisms underlying the plant responses to climate change at each of the nine sites**

| Site        | MAT  | MAP | Grass | ANPP or Coverage | Mechanisms reported                                                                                                                                                                                                                       | Ref(s).            |
|-------------|------|-----|-------|------------------|-------------------------------------------------------------------------------------------------------------------------------------------------------------------------------------------------------------------------------------------|--------------------|
| Fenghuoshan | -5.3 | 270 | ↓     | ↑                | Graminoids (grasses and sedges) decreased and forbs increased under warming. Warming stimulated ANPP because the direct warming effect on plants overrides the indirect warming effect on soil moisture at this temperature-limited site. | 58                 |
| Beiluhe     | -5.2 | 290 |       | ↑                | Warming tended to stimulate ANPP at this temperature-limited site.                                                                                                                                                                        | 64                 |
| Guoluo      | -3.9 | 513 | ↑     | ↑                | Warming stimulated ANPP at this temperature-limited site.                                                                                                                                                                                 | 61                 |
| Damxung     | -2.8 | 372 |       | ↓                | The reduced ANPP was largely due to the indirect warming effect on soil moisture at low elevation.                                                                                                                                        | 59, 60             |
| Haibei      | -1.2 | 488 | ↑     | —                | Different results were observed in different studies. The overall neutral response of primary production was mainly because the positive warming effect on plants offset the negative effect of soil moisture.                            | 24, 25, 54, 55, 63 |
| Naqu        | -1.2 | 431 | ↑     | ↑                | Warming stimulated ANPP when soil moisture at deeper depth was not affected by warming.                                                                                                                                                   | 56                 |
| Niaodao     | -0.7 | 322 | ↑     | ↑                | Warming increased community coverage at restoring alpine steppe.                                                                                                                                                                          | 57                 |
| Hongyuan    | 0.6  | 660 | ↑     | ↓                | The reduced ANPP was related to the warming-induced water limitation.                                                                                                                                                                     | 53                 |
| Kakagou     | 2.8  | 717 | ↑     | ↓                | The reduced ANPP was related to the warming-induced water limitation.                                                                                                                                                                     | 62                 |

MAT, mean annual air temperature; MAP, mean annual precipitation; grass, relative abundance of grass. ↑ indicates increase; ↓ indicates decrease; — indicates no change.
